# Supplementary material
Source: PubMed Central journal article supplement (PMC2810251)
Supplement: NIHMS167908-supplement-1_si_001.pdf [file NIHMS167908-supplement-1_si_001.pdf]

# Supporting Information

## Array Based Sensing of Normal, Cancerous and Metastatic Cells using Conjugated Fluorescent Polymers

Avinash Bajaj<sup>§</sup> Oscar R. Miranda,<sup>§</sup> Ronnie Phillips,<sup>#</sup> Ik-Bum Kim,<sup>#</sup> D. Joseph Jerry,<sup>‡</sup>  
Uwe H. F. Bunz<sup>#,\*</sup> and Vincent M. Rotello<sup>§,\*</sup>

<sup>§</sup>Departments of Chemistry and <sup>‡</sup>Veterinary and Animal Science, University of  
Massachusetts, 710 North Pleasant Street, Amherst, Massachusetts 01003, and <sup>#</sup>School of  
Chemistry and Biochemistry, Georgia Institute of Technology, 901 Atlantic Drive,  
Atlanta, Georgia 30332

E-mail: [rotello@chem.umass.edu](mailto:rotello@chem.umass.edu); [uwe.bunz@chemistry.gatech.edu](mailto:uwe.bunz@chemistry.gatech.edu)

### Complete Reference 10

Croswell, J. M.; Kramer, B. S.; Kreimer, A. R.; Prorok, P. C.; Xu, J. L.; Baker, S. G.;  
Fagerstrom, R.; Riley, T. L.; Clapp, J. D.; Berg, C. D.; Gohagan JK, Andriole GL, Chia  
D, Church, T. R.; Crawford, E. D.; Fouad, M. N.; Gelmann, E. P.; Lamerato, L.; Reding,  
D. J.; Schoen, R. E. *Ann. Fam. Med.* **2009**, 7, 212.

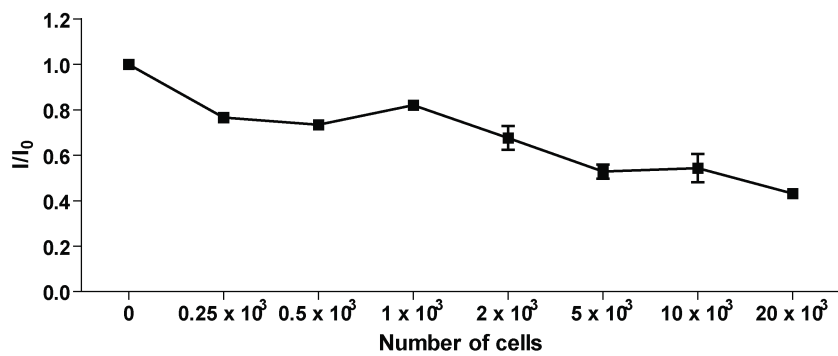

**Figure S1.** Change in the fluorescence intensity of the polymer **1** on incubation with different number of cells.

| Cell line | P1          | P2          | P3          | P4          | P5          | P6          | P7          | P8          | Unknown result |
|-----------|-------------|-------------|-------------|-------------|-------------|-------------|-------------|-------------|----------------|
| V14       | 0.366248709 | 0.683032667 | 0.67157169  | 0.35528237  | 0.585016609 | 0.48132495  | 0.805899235 | 0.760861045 | yes            |
| V14       | 0.384795057 | 0.675620096 | 0.704654637 | 0.355681525 | 0.617352203 | 0.490360474 | 0.806510704 | 0.746432364 | yes            |
| V14       | 0.381277564 | 0.634321681 | 0.773671744 | 0.317437464 | 0.642393601 | 0.479584147 | 0.873242059 | 0.689724218 | yes            |
| V14       | 0.387364782 | 0.66157863  | 0.766842225 | 0.342107393 | 0.634705844 | 0.470340212 | 0.863460286 | 0.682708153 | yes            |
| V14       | 0.392656108 | 0.523760684 | 0.810339558 | 0.331977357 | 0.64133609  | 0.510420854 | 0.855467918 | 0.669073086 | yes            |
| V14       | 0.364767055 | 0.397628062 | 0.791497954 | 0.364273786 | 0.590340288 | 0.552488075 | 0.820466075 | 0.674043803 | no             |
| V14       | 0.393511342 | 0.596385875 | 0.754993136 | 0.366888749 | 0.695301497 | 0.525980186 | 0.812743284 | 0.686896927 | yes            |
| V14       | 0.391056084 | 0.663397319 | 0.706233157 | 0.311683162 | 0.732311359 | 0.587189254 | 0.969466369 | 0.696946067 | yes            |
| V14       | 0.389331492 | 0.618756605 | 0.603778789 | 0.302339228 | 0.629954163 | 0.528538497 | 0.822103705 | 0.745600648 | yes            |
| V14       | 0.370477171 | 0.379931142 | 0.749410119 | 0.282652336 | 0.626252223 | 0.523823227 | 0.840592717 | 0.804478537 | no             |
| V14       | 0.372268203 | 0.462966988 | 0.621398804 | 0.288405148 | 0.593008033 | 0.494746601 | 0.834329135 | 0.826599154 | no             |
| HeLa      | 0.429389038 | 0.464395179 | 0.667761457 | 0.358545531 | 0.637224432 | 0.491931727 | 0.874398978 | 0.709775611 | yes            |
| HeLa      | 0.406507658 | 0.376148964 | 0.662744163 | 0.31955545  | 0.60365575  | 0.535297665 | 0.840459146 | 0.718129065 | yes            |
| HeLa      | 0.486159172 | 0.440522232 | 0.631908538 | 0.526818352 | 0.820251579 | 0.574294552 | 0.801268001 | 0.710240815 | no             |
| HeLa      | 0.427326617 | 0.394236681 | 0.58672307  | 0.346286702 | 0.660376819 | 0.574839556 | 0.800932624 | 0.721373938 | yes            |
| MCF-7     | 0.416427939 | 0.530846169 | 0.704036103 | 0.335791239 | 0.652169222 | 0.527675963 | 0.8926361   | 0.754589833 | yes            |
| MCF-7     | 0.405074438 | 0.704738895 | 0.700441411 | 0.308235802 | 0.654881472 | 0.515406169 | 0.883295787 | 0.776765342 | yes            |
| MCF-7     | 0.388654855 | 0.602657603 | 0.686330134 | 0.310817807 | 0.734605505 | 0.539120254 | 0.855551942 | 0.753982312 | no             |
| NT2       | 0.461442861 | 0.485256465 | 0.681861213 | 0.355311102 | 0.668583031 | 0.534608793 | 0.930641898 | 0.744725743 | yes            |
| TD        | 0.386771912 | 0.531994769 | 0.573885209 | 0.319791545 | 0.632368377 | 0.485689574 | 0.847784419 | 0.732284229 | yes            |
| TD        | 0.372704832 | 0.56405317  | 0.643923994 | 0.33350966  | 0.603604804 | 0.469582751 | 0.801989128 | 0.719047846 | yes            |
| TD        | 0.366802086 | 0.538408738 | 0.55087671  | 0.289032233 | 0.587633332 | 0.478811865 | 0.850512401 | 0.732279104 | yes            |
| TD        | 0.346215317 | 0.470347837 | 0.667114715 | 0.295018342 | 0.712326721 | 0.492152263 | 0.860423141 | 0.70366771  | yes            |
| NT2       | 0.47689649  | 0.514934025 | 0.738744863 | 0.418041654 | 0.586671092 | 0.529391431 | 0.892127888 | 0.746955013 | yes            |

Figure S2. Fluorescence ratio data and results of unknown cell samples.
